# Supplementary material for: Early Vitamin C and Thiamine Administration to Patients with Septic Shock in Emergency Departments: Propensity Score-Based Analysis of a Before-and-After Cohort Study
Source: PubMed Central journal article supplement (PMC6352246; doi:10.3390/jcm8010102), 2019-01-16
Supplement: jcm-08-00102-s001.pdf [file jcm-08-00102-s001.pdf]

**Table S1.** Baseline Characteristics of the Unmatched Cohort by Hospital.

| Variable                                             | Hospital A                  |                            |       | Hospital B                   |                            |       |
|------------------------------------------------------|-----------------------------|----------------------------|-------|------------------------------|----------------------------|-------|
|                                                      | Treatment Group<br>(n = 85) | Control Group<br>(n = 489) | P     | Treatment Group<br>(n = 144) | Control Group<br>(n = 426) | P     |
| Age, years                                           | 69 (60–76)                  | 67 (58–75)                 | 0.18  | 65 (58–74)                   | 67 (59–76)                 | 0.27  |
| Sex, male                                            | 51 (60.0)                   | 305 (62.4)                 | 0.67  | 85 (59.0)                    | 272 (63.9)                 | 0.30  |
| Comorbidities                                        |                             |                            |       |                              |                            |       |
| Hypertension                                         | 37 (43.5)                   | 187 (38.2)                 | 0.35  | 52(36.1)                     | 136 (31.9)                 | 0.35  |
| Diabetes                                             | 29 (34.1)                   | 159 (32.5)                 | 0.77  | 42 (29.2)                    | 105 (24.7)                 | 0.28  |
| Cardiac disease                                      | 11 (12.9)                   | 79 (16.2)                  | 0.45  | 13 (9.0)                     | 49 (11.5)                  | 0.40  |
| Chronic lung disease                                 | 5 (5.9)                     | 36 (7.4)                   | 0.62  | 12 (8.3)                     | 41 (9.6)                   | 0.64  |
| Chronic renal disease                                | 6 (7.1)                     | 36 (7.4)                   | 0.92  | 9 (6.3)                      | 27 (6.3)                   | 0.97  |
| Chronic liver disease                                | 13 (15.3)                   | 77 (15.8)                  | 0.91  | 22 (15.3)                    | 68 (16.0)                  | 0.84  |
| Hematologic malignancy                               | 8 (9.4)                     | 62 (12.7)                  | 0.39  | 11 (7.6)                     | 32 (7.5)                   | 0.96  |
| Metastatic solid cancer                              | 21 (24.7)                   | 134 (27.4)                 | 0.60  | 51 (35.4)                    | 158 (37.1)                 | 0.71  |
| Suspected infection focus                            |                             |                            | 0.20  |                              |                            | 0.11  |
| Respiratory infection                                | 13 (15.3)                   | 123 (25.2)                 |       | 28 (19.4)                    | 104 (24.4)                 |       |
| Urinary tract infection                              | 17 (20.0)                   | 72 (14.7)                  |       | 24 (16.7)                    | 45 (10.6)                  |       |
| Intra-abdominal infection                            | 33 (38.8)                   | 174 (35.6)                 |       | 52 (36.1)                    | 176 (41.3)                 |       |
| Others or unknown                                    | 22 (25.9)                   | 120 (24.5)                 |       | 40 (27.8)                    | 101 (23.7)                 |       |
| Laboratory tests                                     |                             |                            |       |                              |                            |       |
| WBC count ( $\times 10^3/\mu\text{L}$ )              | 9.4 (2.8–15.1)              | 9.3 (3.6–16.3)             | 0.64  | 7.8 (4.6–14.9)               | 10.4 (5.3–17.2)            | 0.06  |
| Hemoglobin (g/dL)                                    | 10.3 (8.8–12.0)             | 10.9 (9.0–12.5)            | 0.16  | 10.6 (9.0–12.3)              | 10.7 (9.0–12.4)            | 0.99  |
| Platelet count ( $\times 10^3/\mu\text{L}$ )         | 113 (65–167)                | 131 (60–226)               | 0.25  | 142 (76–191)                 | 146 (69–222)               | 0.48  |
| Creatinine (mg/dL)                                   | 1.4 (0.9–2.5)               | 1.1 (0.8–1.8)              | <0.01 | 1.2 (0.9–2.0)                | 1.3 (0.9–2.1)              | 0.82  |
| ALT (U/L)                                            | 31 (15–57)                  | 28 (17–54)                 | 0.90  | 29 (16–57)                   | 28 (15–59)                 | 0.84  |
| Albumin (g/dL)                                       | 3.0 (2.7–3.5)               | 3.3 (2.9–3.7)              | 0.01  | 2.6 (2.3–3.0)                | 2.6 (2.1–3.0)              | 0.15  |
| Initial lactate (mmol/L)                             | 4.1 (2.7–6.3)               | 4.1 (2.3–5.6)              | 0.37  | 3.0 (2.0–5.4)                | 3.1 (1.7–5.4)              | 0.51  |
| Blood culture positive                               | 54 (63.5)                   | 186 (38.0)                 | <0.01 | 63 (43.8)                    | 181 (42.5)                 | 0.79  |
| Septic shock criteria, Sepsis-3 consensus definition | 65 (76.5)                   | 243 (49.7)                 | <0.01 | 87 (60.4)                    | 198 (46.5)                 | <0.01 |
| Adjunctive steroid use                               | 35 (41.2)                   | 133 (27.2)                 | <0.01 | 27 (18.8)                    | 92 (21.6)                  | 0.46  |
| Vasopressor use                                      | 81 (95.3)                   | 367 (75.1)                 | <0.01 | 136 (94.4)                   | 382 (89.7)                 | 0.08  |
| Mechanical ventilation                               | 32 (37.7)                   | 140 (28.6)                 | 0.09  | 35 (24.3)                    | 121 (28.4)                 | 0.34  |
| Source control interventions                         | 25 (29.4)                   | 158 (32.3)                 | 0.59  | 33 (22.9)                    | 116 (27.2)                 | 0.30  |
| Maximum 24-h SOFA score                              | 10 (8–13)                   | 8 (5–11)                   | <0.01 | 8 (6–10)                     | 7 (5–11)                   | 0.29  |
| APACHE II score                                      | 27 (23–33)                  | 23 (18–29)                 | <0.01 | 17 (11–22)                   | 17 (13–22)                 | 0.29  |

Data are shown as median (interquartile range) or *n* (%). ALT, alanine aminotransferase; APACHE, Acute Physiology and Chronic Health Evaluation; SOFA, Sepsis-related Organ Failure Assessment; WBC, white blood cell.

**Table S2.** Baseline Characteristics of the Propensity-Matched Cohort by Hospital.

| Variable | Hospital A |         |   | Hospital B |         |   |
|----------|------------|---------|---|------------|---------|---|
|          | Treatment  | Control | P | Treatment  | Control | P |

|                                                      | <b>Group<br/>(n = 85)</b> | <b>Group<br/>(n = 256)</b> |      | <b>Group<br/>(n = 142)</b> | <b>Group<br/>(n = 271)</b> |      |
|------------------------------------------------------|---------------------------|----------------------------|------|----------------------------|----------------------------|------|
| Age, years                                           | 69 (60–76)                | 68 (58–76)                 | 0.69 | 65 (58–75)                 | 66 (57–75)                 | 0.94 |
| Sex, male                                            | 51 (60.0)                 | 151 (59.0)                 | 0.80 | 84 (59.2)                  | 161 (59.4)                 | 0.83 |
| Comorbidities                                        |                           |                            |      |                            |                            |      |
| Hypertension                                         | 37 (43.5)                 | 107 (41.8)                 | 0.97 | 51 (35.9)                  | 94 (34.7)                  | 0.94 |
| Diabetes                                             | 29 (34.1)                 | 83 (32.4)                  | 0.64 | 40 (28.2)                  | 71 (26.2)                  | 0.66 |
| Cardiac disease                                      | 11 (12.9)                 | 32 (12.5)                  | 0.63 | 13 (9.2)                   | 25 (9.2)                   | 0.90 |
| Chronic lung disease                                 | 5 (5.9)                   | 15 (5.9)                   | 0.75 | 11 (7.8)                   | 23 (8.5)                   | 0.80 |
| Chronic renal disease                                | 6 (7.1)                   | 21 (8.2)                   | 0.97 | 9 (6.3)                    | 16 (5.9)                   | 0.76 |
| Chronic liver disease                                | 13 (15.3)                 | 38 (14.8)                  | 0.87 | 21 (14.8)                  | 43 (15.9)                  | 0.85 |
| Hematologic malignancy                               | 8 (9.4)                   | 21 (8.2)                   | 0.60 | 11 (7.8)                   | 20 (7.4)                   | 0.89 |
| Metastatic solid cancer                              | 21 (24.7)                 | 71 (27.7)                  | 0.83 | 50 (35.2)                  | 90 (33.2)                  | 0.78 |
| Suspected infection focus                            |                           |                            | 0.99 |                            |                            | 0.86 |
| Respiratory infection                                | 13 (15.3)                 | 43 (16.8)                  |      | 27 (19.0)                  | 53 (19.6)                  |      |
| Urinary tract infection                              | 17 (20.0)                 | 48 (18.8)                  |      | 23 (16.2)                  | 40 (14.8)                  |      |
| Intra-abdominal infection                            | 33 (38.8)                 | 99 (38.7)                  |      | 52 (36.6)                  | 103 (38.0)                 |      |
| Others or unknown                                    | 22 (25.9)                 | 66 (25.8)                  |      | 40 (28.2)                  | 75 (27.7)                  |      |
| Laboratory tests                                     |                           |                            |      |                            |                            |      |
| WBC count ( $\times 10^3/\mu\text{L}$ )              | 9.4 (2.8–15.1)            | 8.5 (2.4–15.7)             | 0.73 | 7.8 (4.6–15.0)             | 10.4<br>(4.9–16.7)         | 0.87 |
| Hemoglobin (g/dL)                                    | 10.3 (8.8–12.0)           | 10.6<br>(8.7–12.2)         | 0.86 | 10.6 (9.0–12.4)            | 10.7<br>(9.0–12.7)         | 0.74 |
| Platelet count ( $\times 10^3/\mu\text{L}$ )         | 113 (65–167)              | 122 (46–225)               | 0.56 | 142 (77–189)               | 142 (66–204)               | 0.87 |
| Creatinine (mg/dL)                                   | 1.4 (0.9–2.5)             | 1.3 (1.0–2.1)              | 0.93 | 1.2 (0.9–2.0)              | 1.4 (0.9–2.3)              | 0.75 |
| ALT (U/L)                                            | 31 (15–57)                | 28 (18–55)                 | 0.84 | 30 (16–58)                 | 28 (16–59)                 | 0.90 |
| Albumin (g/dL)                                       | 3.0 (2.7–3.5)             | 3.2 (2.7–3.5)              | 0.75 | 2.6 (2.3–3.0)              | 2.6 (2.1–3.1)              | 0.78 |
| Initial lactate (mmol/L)                             | 4.1 (2.7–6.3)             | 3.5 (2.2–5.5)              | 0.90 | 3.0 (2.0–5.4)              | 3.1 (1.8–5.3)              | 0.93 |
| Blood culture positive                               | 54 (63.5)                 | 134 (52.3)                 | 0.65 | 62 (43.7)                  | 119 (43.9)                 | 0.83 |
| Septic shock criteria, Sepsis-3 consensus definition | 65 (76.5)                 | 176 (68.8)                 | 0.79 | 85 (59.9)                  | 155 (57.2)                 | 0.81 |
| Adjunctive steroid use within 48 h                   | 35 (41.2)                 | 80 (31.3)                  | 0.77 | 27 (19.0)                  | 53 (19.6)                  | 0.92 |
| Vasopressor use                                      | 81 (95.3)                 | 240 (93.8)                 | 1.00 | 134 (94.4)                 | 256 (94.5)                 | 0.86 |
| Mechanical ventilation                               | 32 (37.7)                 | 79 (30.9)                  | 0.76 | 34 (23.9)                  | 65 (24.0)                  | 0.87 |
| Source control interventions                         | 25 (29.4)                 | 85 (33.2)                  | 0.66 | 33 (23.2)                  | 63 (23.3)                  | 0.87 |
| Maximum 24-h SOFA score                              | 10 (8–13)                 | 9 (7–12)                   | 0.68 | 8 (6–10)                   | 7 (5–11)                   | 0.69 |
| APACHE II score                                      | 27 (23–33)                | 25 (20–32)                 | 0.54 | 17 (11–22)                 | 17 (12–22)                 | 0.82 |

Data are shown as median (interquartile range) or *n* (%). ALT, alanine aminotransferase; APACHE, Acute Physiology and Chronic Health Evaluation; SOFA, Sepsis-related Organ Failure Assessment; WBC, white blood cell.
